# Supplementary material
Source: publisher site journal article supplement (https://www.dovepress.com/article/415881)
Supplement: Supplementary file 1 [file get_supplementary_file.php]

| Table S1 Baseline demographic and clinical characteristics in Depression patients (N=120) | |
| --- | --- |
|  | **Depression patients,**  **N (%), N=120** |
| **Gender (%)** |  |
| Male | 30(25.0) |
| Female | 90(75.0) |
| **Age, years mean (s.d.)** | 55.0±16.7 |
| **Age of onset** | 45.7±15.9 |
| **Duration of Depression** | 9.2±8.6 |
| **Years of education** | 11.9±4.1 |
| **Education** |  |
| Less than high school(<12) | 37(30.8) |
| More than college(≧12) | 83(69.2) |
| **Marital Status** |  |
| Unmarried | 51(42.5) |
| Married | 69(57.5) |
| **Unemployment** | 89(74.2) |
| **Comorbid with other diseases** | 84(70.0) |
| **Self labelling psychiatric history** |  |
| Depressive disorder | 102(85.0) |
| Anxiety disorder | 20(16.7) |
| Insomnia | 54(45.0) |
| Panic | 2(1.7) |
| **Suicide history** | 35(39.2) |
| **Family psychiatric history** |  |
| No psychiatric history | 75(62.5) |
| Depressive disorder | 30(25.0) |
| Anxiety disorder | 5(4.2) |
| Insomnia | 3(2.5) |
| Dementia | 5(4.2) |
| **Family suicide history** | 7(5.8) |
| **Anxiolytics/Hypnotics use** | 103(85.8) |
| **NPRS** | 3.7(0-10) |
| **HADS total scores** | 15.5±8.8 |
| HADS-D | 7.8±4.8 |
| HADS-A | 7.7±4.8 |
| **APGAR** | 6.8±3.5 |
| **MINI suicidality** | 3.0(0-33) |
| **MINI suicidality level** |  |
| High risk | 7(5.8) |
| Moderate risk | 7(5.8) |
| Low risk | 46(38.3) |
| **EMIC Stigma Scale** | 9.6(0-36) |
| **BFS Total scores** | 48.2±21.7 |
| Acceptance | 7.8±4.2 |
| Family Relations | 4.7±2.9 |
| Word View | 7.0±3.8 |
| Personal Growth | 13.4±7.9 |
| Social Relations | 7.4±4.6 |
| Health Behavior | 8.0±4.5 |
| **SAS Total scores** | 20.9(0-72) |
| Negative ideation | 4.9(0-20) |
| Positive ideation | 9.5(0-20) |
| Impulsivity | 2.3(0-19) |
| Aggression | 4.2(0-18) |
| NPRS=Numeric Pain Rating Scale；HADS= Hospital Anxiety and Depression Scale；HADS-D= Depression scale of HADS；HADS-A= Anxiety scale of HADS；APGAR= Family APGAR Index；EMIC = Explanatory Model Interview Catalogue；SAS= Suicide Assessment Scale | |
